# Supplementary material
Source: PubMed Central journal article supplement (PMC3310387)

## Supporting Information

**Figure S1: Characterization of primary astrocyte cultures.** (A) Quantification of CD11B and GFAP positive cells performed by manual counting in cultures that were plated after shaking overnight and imaged by confocal microscopy. (B) Representative image of primary astrocyte culture showing abundant GFAP (red) positive astrocytes after enrichment by shaking. White arrows indicate CD11B (green) positive microglia; DAPI (blue) was used for nuclei labeling. Scale bar, 50  $\mu$ m.

**Figure S2: Analysis of cell death in p47<sup>PHOX</sup> siRNA treated astrocytes.** Representative confocal micrographs of PI and Hoechst positive astrocytes 48 hours after transfection with p47<sup>PHOX</sup> siRNA. Control cultures were treated with media only. Scale bar, 50 $\mu$ m.

**Figure S3: Inhibition of aNF- $\kappa$ B reduces ROS production in response to IR injury.** Confocal analysis of unfixed frozen retinal cross-sections stained with the superoxide indicator dye DHE (red) 24 hours post-IR. Unfixed retinal sections were analyzed by confocal microscopy immediately after DHE staining. DAPI (blue) was used for nuclei labeling. Scale bar, 50  $\mu$ m.

**Figure S4: Caspase-3 activation in co-cultures of primary astrocytes and RGCs.** (A) Astrocyte-RGC co-cultures stained for NeuN (green) and active-caspase-3 (red) in control and 24 hours post OGD treatment. (B) Astrocyte-RGC co-culture stained for beta-III tubulin (green) and active-caspase-3 (red) in control and 24 hours post OGD treated cultures. Arrows indicate RGCs double-labeled for NeuN and activated caspase-3. Scale bar 50 $\mu$ m.

**Figure S5: Primary RGC cultures treated with ACM.** Representative confocal micrographs of primary RGCs stained with AnnexinV/PI death detection kit in Control ACM and OGD ACM treated cultures. Membrane labeling by Annexin V (green) and nuclear labeling by PI (red) and Hoechst (blue). Scale bar, 50 $\mu$ m.

**Figure S6: p47<sup>PHOX</sup> specific labeling in retinal astrocytes.** Representative confocal micrographs of retinal whole mounts from naive WT and TG retinas stained for p47<sup>PHOX</sup> and GFAP. Control retinas were treated with monoclonal Cy3 conjugated GFAP and Alexa Fluor 488 conjugated goat anti-rabbit secondary antibodies. Scale bar, 50 $\mu$ m.

Figure S1

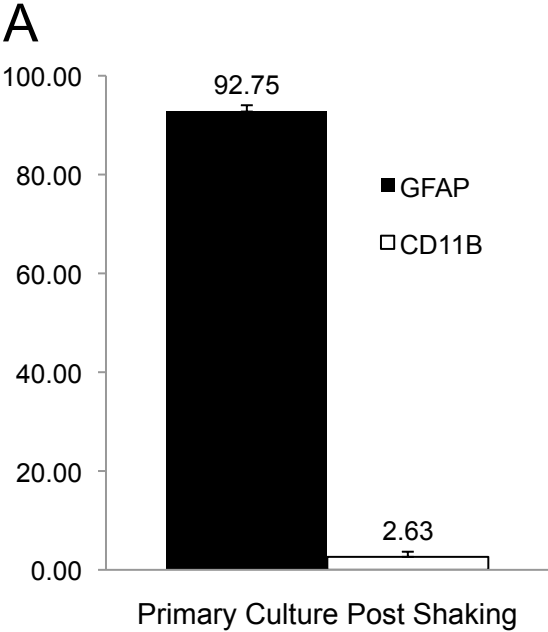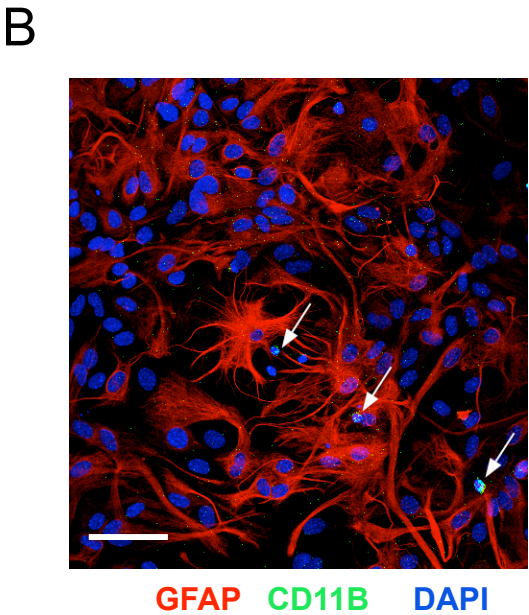

Figure S2

Control

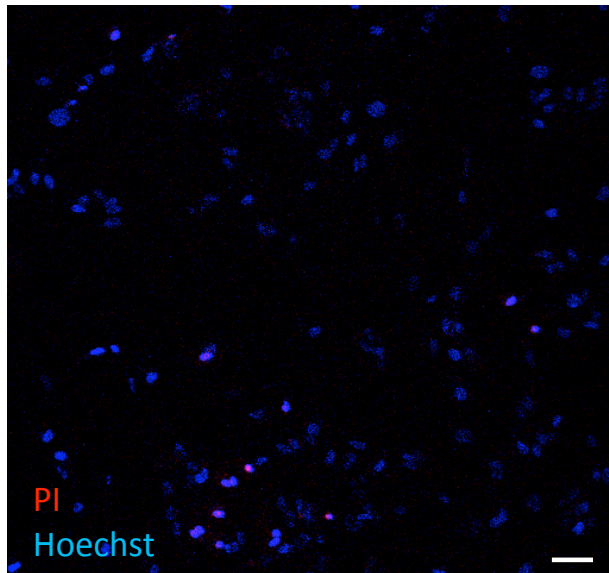

p47<sup>PHOX</sup> siRNA

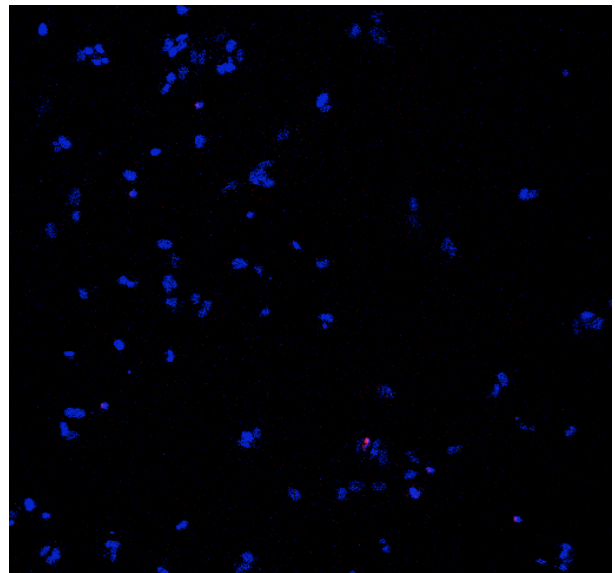

Figure S3

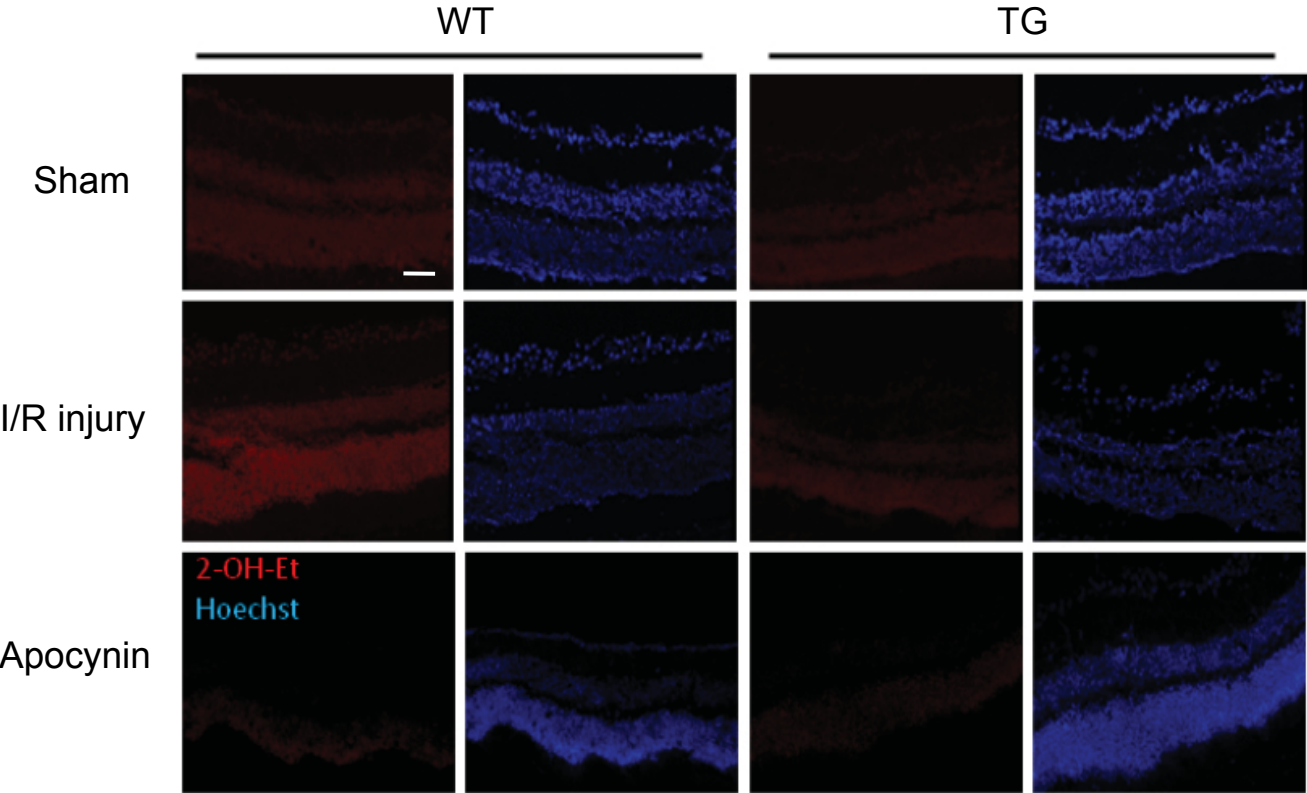

Figure S4

A

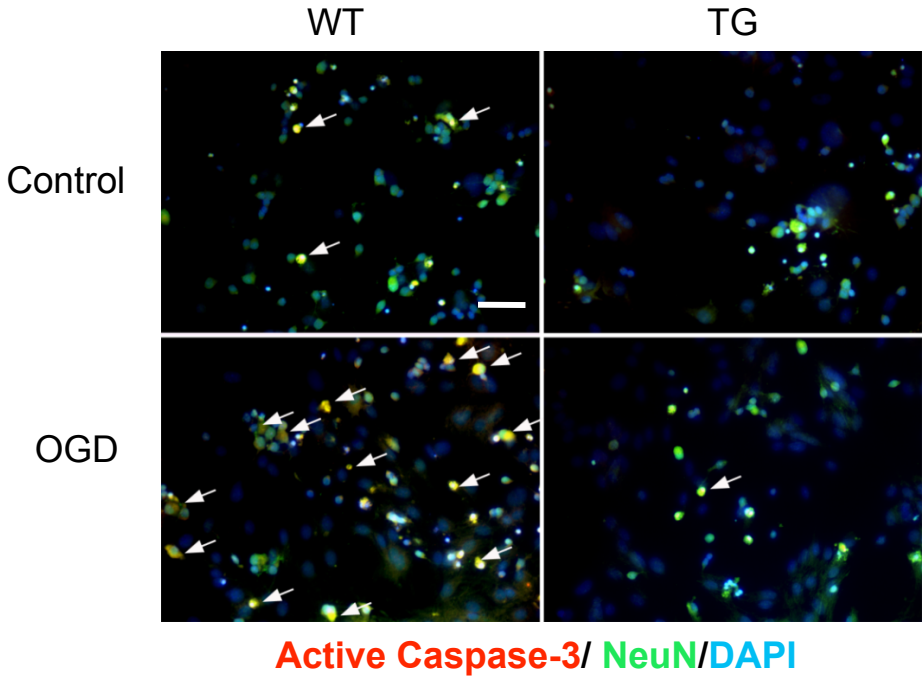

B

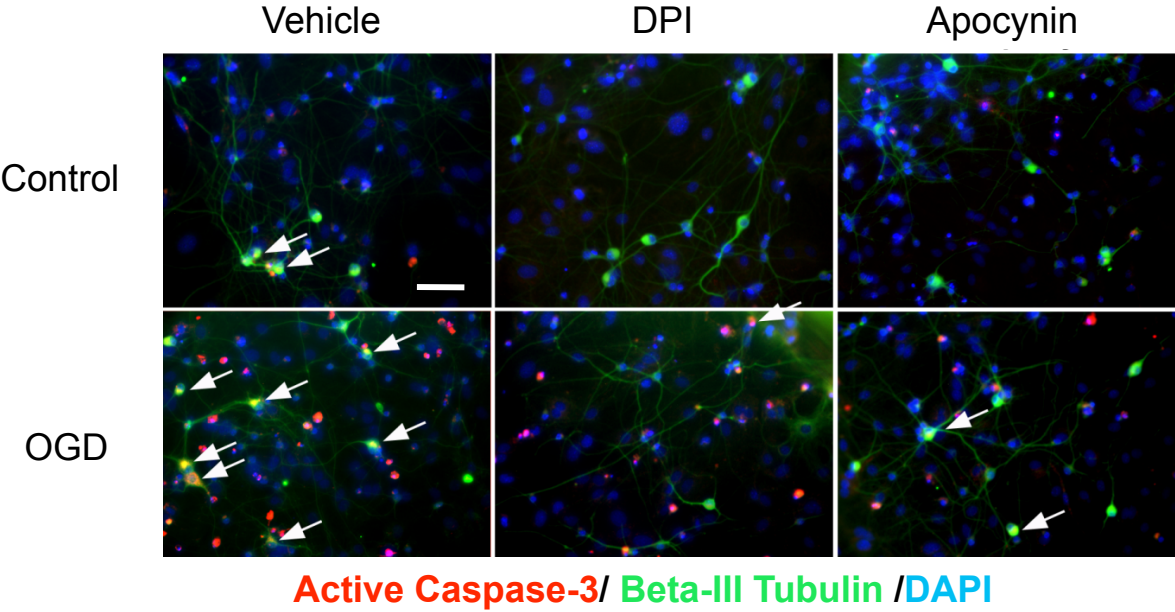

Figure S5

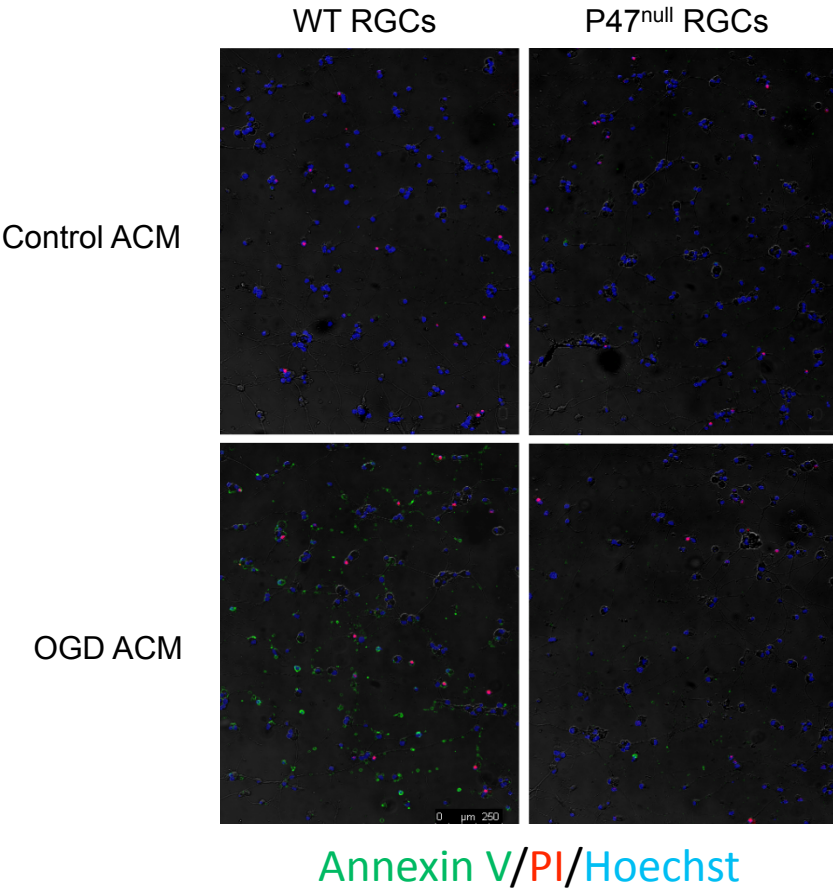



Figure S6

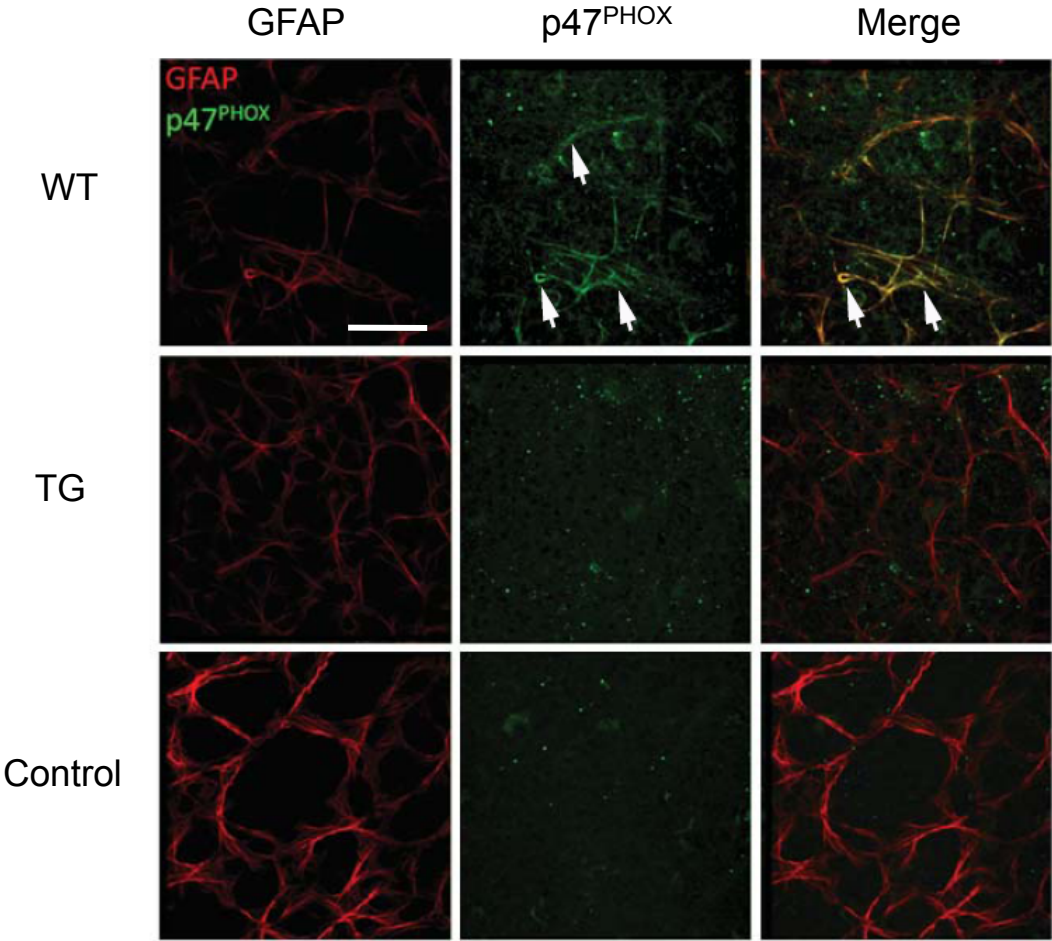

Supplement: NIHMS341079-supplement-Supp_Fig_S1-_S6.pdf [file NIHMS341079-supplement-Supp_Fig_S1-_S6.pdf]
